# Supplementary material for: Tyrosine Binding Protein Sites Regulate the Intracellular Trafficking and Processing of Amyloid Precursor Protein through a Novel Lysosome-Directed Pathway
Source: PubMed Central journal article supplement (PMC5077117; doi:10.1371/journal.pone.0161445), 2016-10-24

Supplemental Figure 1.

PKC $\epsilon$  activation does not control the trafficking of APP with S711E or S711A mutations.

Tam et al. 2016

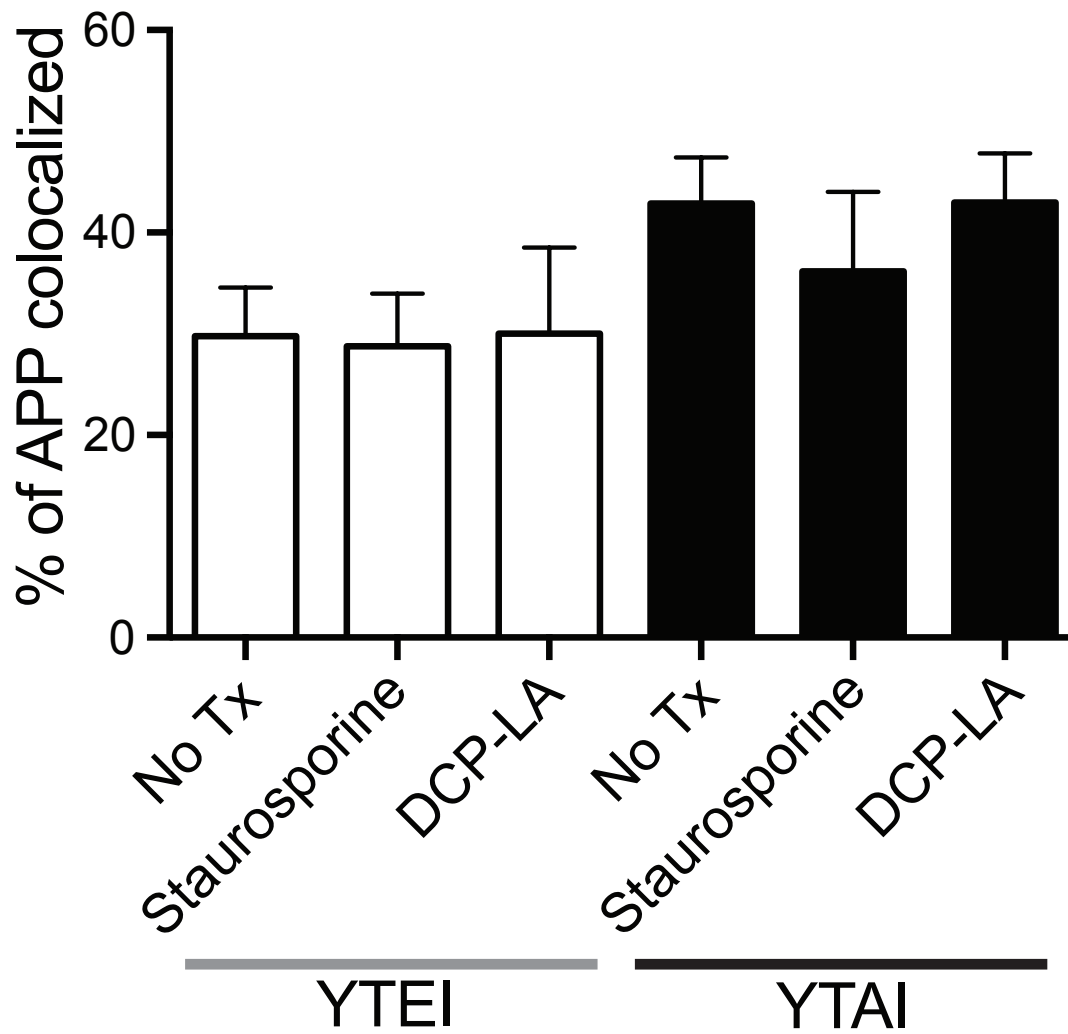

Supplement: pone.0161445.s001.pdf [file pone.0161445.s001.pdf]
